# Supplementary material
Source: MDPI journal article supplement (https://www.mdpi.com/2073-4433/14/11/1704)
Supplement: s1 [file s1 › atmosphere-2694549-supplementary.pdf]

# Characteristics Analysis and Short-impending Prediction of Aircraft Bumpiness over the Airport Approach Areas and Flight Routes

Jin Ding <sup>1</sup>, Guoping Zhang <sup>1,\*</sup>, Shudong Wang <sup>1</sup>, Bing Xue <sup>1</sup>, Kuoyin Wang <sup>1</sup>, Tingzhao Yu <sup>1</sup>, Ruijiao Jiang <sup>1</sup>, Yu Chen <sup>1</sup>, Yan Huang <sup>1</sup>, Zhimin Li <sup>1</sup>, Ruyi Yang <sup>1</sup>, Xiaodan Liu <sup>1</sup> and Ye Tian <sup>2,\*</sup>

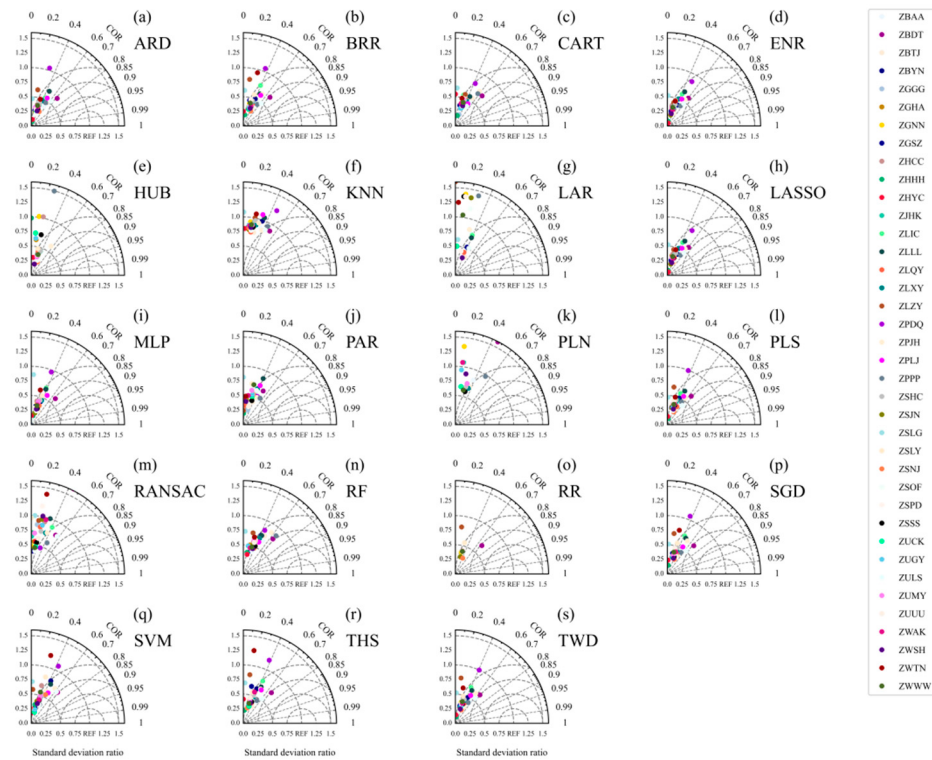

**Figure S1.** Taylor diagram presents a comparison of the every 5 seconds predicted and observed EDR for the next 10 minutes in the testing period over the approach areas. The diagram shows the correlation (the arc coordinate) and ratio of the standard deviation between the every 5 seconds predicted and observed (Abscissa and ordinate).

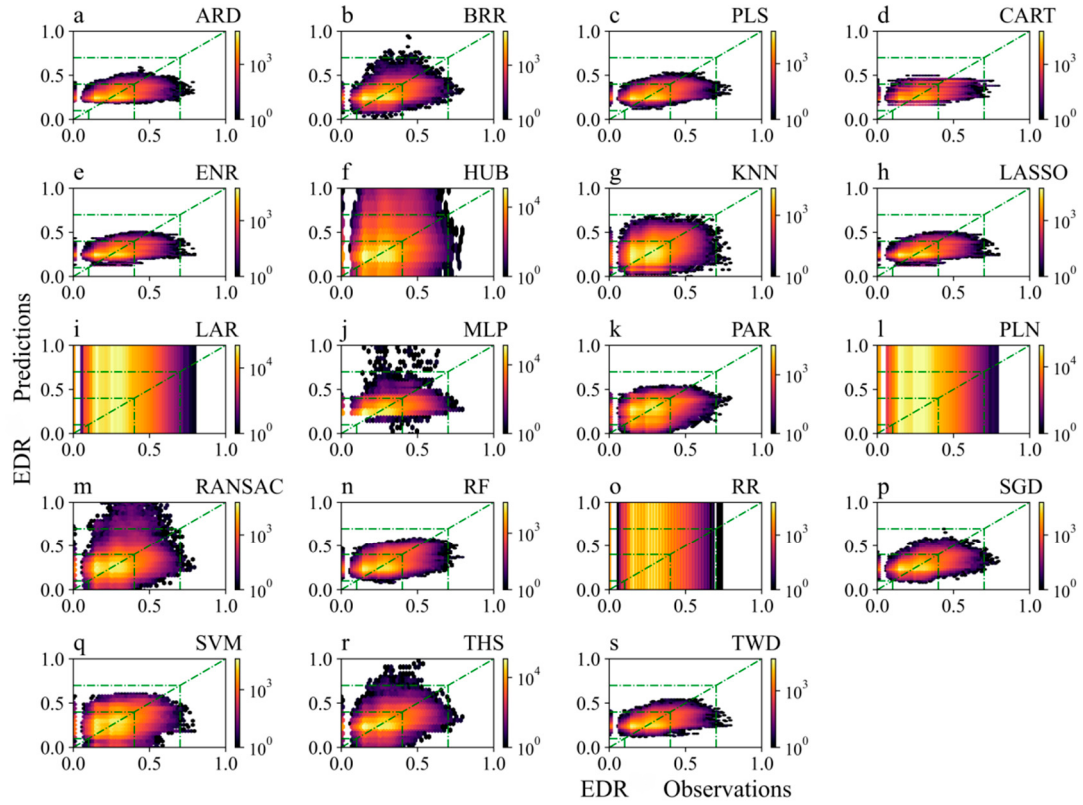

**Figure S2.** Comparison of the EDR observed and predicted for the next 10 minutes in the testing period over the approach areas.

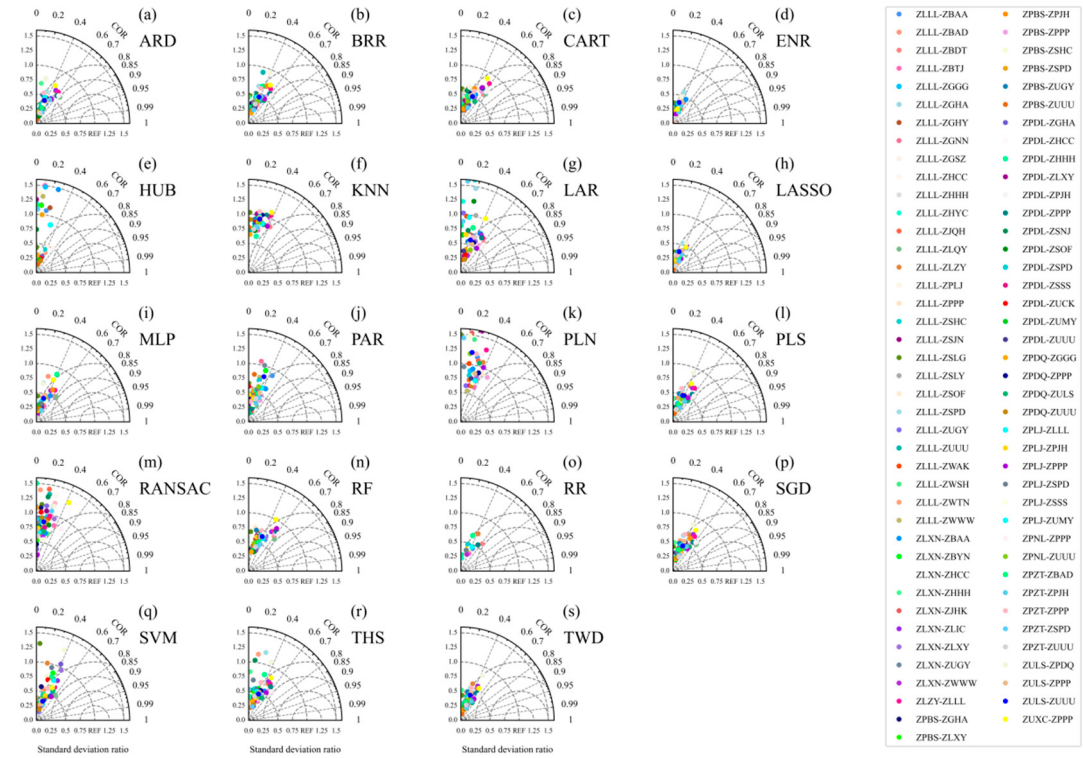

**Figure S3.** Taylor diagram presents a comparison of the every 5 seconds predicted and observed EDR for the next 10 minutes in the testing period on the flight routes. The diagram shows the correlation (the arc coordinate) and ratio of the standard deviation between the every 5 seconds predicted and observed (Abscissa and ordinate).

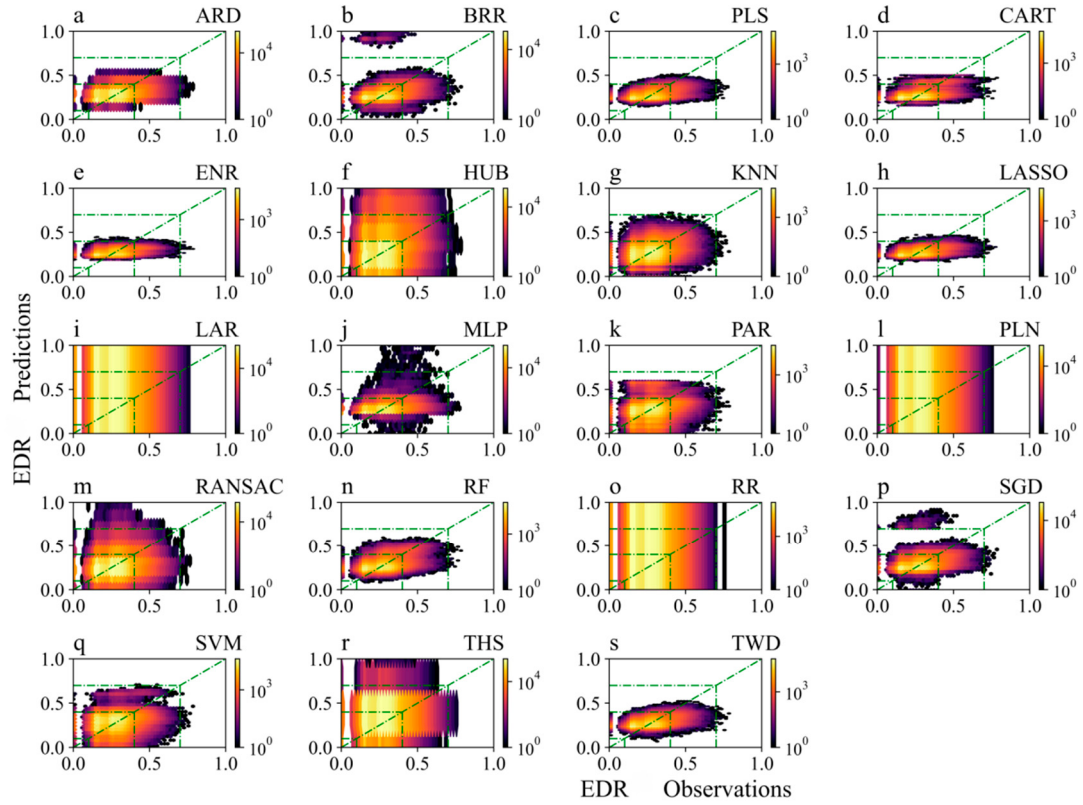

**Figure S4.** Comparison of the EDR observed and predicted for the next 10 minutes in the testing period on the flight routes.

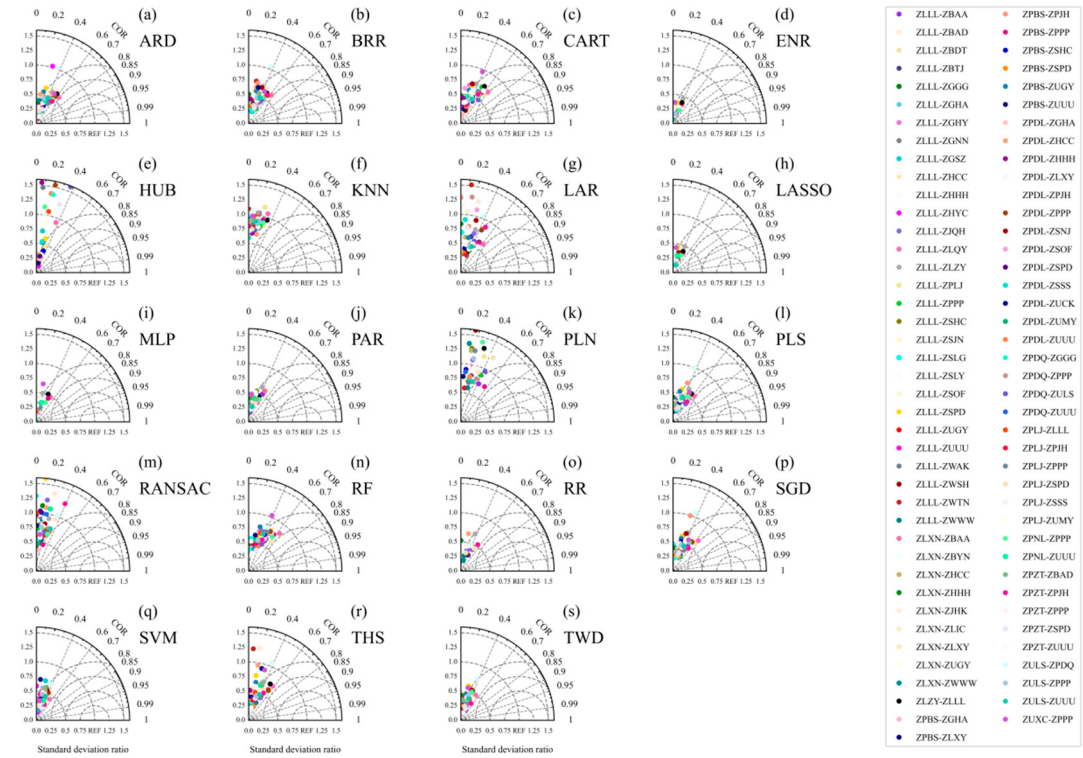

**Figure S5.** Same as Fig. S3 except for the next 20 minutes on the flight routes.

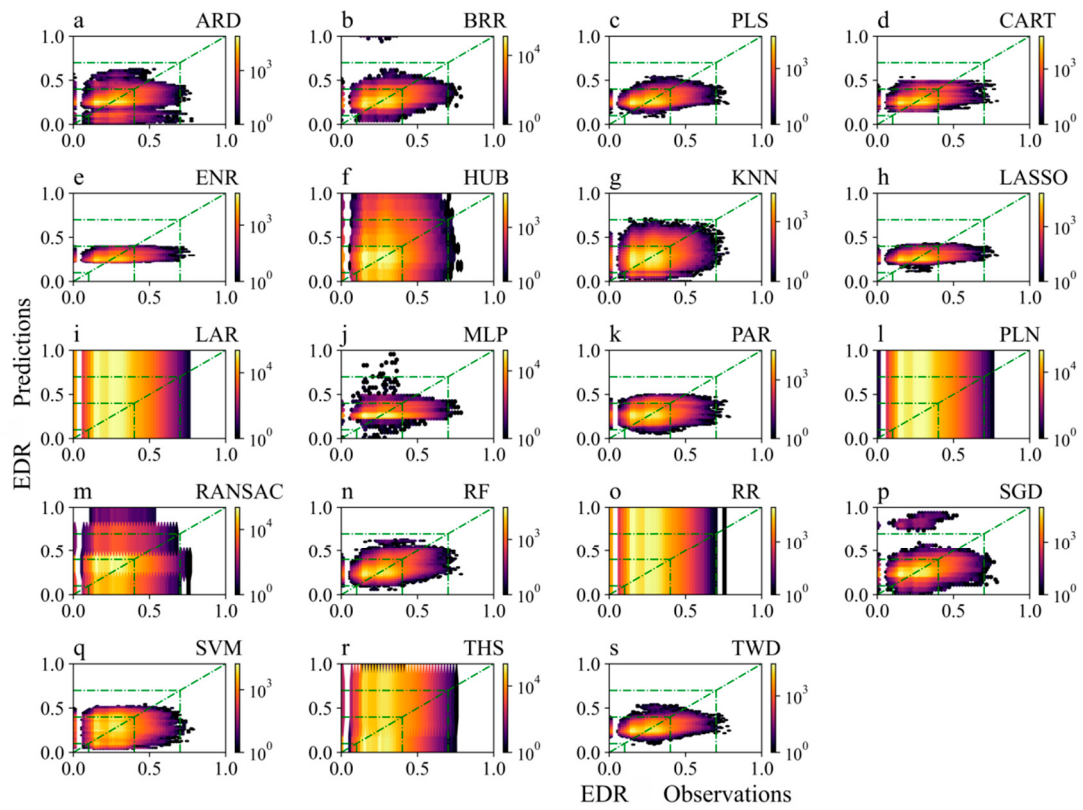

**Figure S6.** Same as Fig. S4 except for the next 20 minutes on the flight routes.
